# Supplementary material for: Effects of a Telehealth Early Palliative Care Intervention for Family Caregivers of Persons With Advanced Heart Failure: The ENABLE CHF-PC Randomized Clinical Trial
Source: PubMed Central journal article supplement (PMC7154802; doi:10.1001/jamanetworkopen.2020.2583), 2020-04-13
Supplement: jamanetwopen-3-e202583-s002.pdf [file jamanetwopen-3-e202583-s002.pdf]

**Dionne-Odom. Effects of a telehealth early palliative care intervention vs usual care for family caregivers of persons with advanced heart failure. *JAMA Netw Open.* 2020;3(4):e202583. 10.1001/jamanetworkopen.2020.2583**

## **Data Sharing Statement**

### **Data**

**Data available:** No
